# Supplementary material
Source: ML conference proceedings conference paper supplement (https://proceedings.mlr.press/v48/liub16.html)
Supplement: Supplementary file [file liub16-supp.pdf]

---

## Appendix for “A Kernelized Stein Discrepancy for Goodness-of-fit Tests”

---

**Qiang Liu**

QLIU@CS.DARTMOUTH.EDU

Computer Science, Dartmouth College, NH, 03755

**Jason D. Lee**

JASONDL88@EECS.BERKELEY.EDU

**Michael Jordan**

JORDAN@CS.BERKELEY.EDU

Department of Electrical Engineering and Computer Science University of California, Berkeley, CA 94709

### A. Proofs

*Proof of Theorem 3.6.* 1) Denote by  $\mathbf{v}(x, x') = k(x, x')\mathbf{s}_q(x') + \nabla_{x'}k(x, x') = \mathcal{A}_q k_x(x')$ ; applying Lemma 2.3 on  $k(x, \cdot)$  with fixed  $x$ ,

$$\begin{aligned} \mathbb{S}(p, q) &= \mathbb{E}_{x, x' \sim p}[(\mathbf{s}_q(x) - \mathbf{s}_p(x))^\top k(x, x')(\mathbf{s}_q(x') - \mathbf{s}_p(x'))] \\ &= \mathbb{E}_{x, x' \sim p}[(\mathbf{s}_q(x) - \mathbf{s}_p(x))^\top \mathbf{v}(x, x')] \end{aligned}$$

Because  $k(\cdot, x')$  is in the Stein class of  $p$  for any  $x'$ , we can show that  $\nabla_{x'}k(\cdot, x')$  is also in the Stein class, since

$$\int_x \nabla_x(p(x)\nabla_{x'}k(x, x'))dx = \nabla_{x'} \int_x \nabla_x(p(x)k(x, x'))dx = 0,$$

and hence  $\mathbf{v}(\cdot, x')$  is also in the Stein class; apply Lemma 2.3 on  $\mathbf{v}(\cdot, x')$  with fixed  $x'$  gives

$$\begin{aligned} \mathbb{S}(p, q) &= \mathbb{E}_{x, x' \sim p}[(\mathbf{s}_q(x) - \mathbf{s}_p(x))^\top \mathbf{v}(x, x')] \\ &= \mathbb{E}_{x, x' \sim p}[\mathbf{s}_q(x)^\top \mathbf{v}(x, x') + \text{trace}(\nabla_x \mathbf{v}(x, x'))] \end{aligned}$$

The result then follows by noting that  $\nabla_x \mathbf{v}(x, x') = \nabla_x k(x, x')\mathbf{s}_q(x')^\top + \nabla_{x'}k(x, x')$ . □

*Proof of Theorem 3.7.* Note that

$$\nabla_x k(x, x') = \sum_j \lambda_j \nabla_x e_j(x) e_j(x'), \quad \nabla_{x'} k(x, x') = \sum_j \lambda_j \nabla_x e_j(x) \nabla_{x'} e_j(x')^\top,$$

and hence

$$\begin{aligned} u_q(x, x') &= \mathbf{s}_q(x)^\top k(x, x')\mathbf{s}_q(x') + \mathbf{s}_q(x)^\top \nabla_x' k(x, x') + \mathbf{s}_q(x')^\top \nabla_x k(x, x') + \text{trace}(\nabla_{x, x'} k(x, x')) \\ &= \sum_j \lambda_j [\mathbf{s}_q(x)^\top e_j(x) e_j(x') \mathbf{s}_q(x') + \mathbf{s}_q(x)^\top e_j(x) \nabla_{x'} e_j(x') + \mathbf{s}_q(x')^\top \nabla_x e_j(x) e_j(x') + \nabla_x e_j(x)^\top \nabla_{x'} e_j(x')] \\ &= \sum_j \lambda_j [\mathbf{s}_q(x) e_j(x) + \nabla_x e_j(x)]^\top [\mathbf{s}_q(x') e_j(x') + \nabla_{x'} e_j(x')] \\ &= \sum_j \lambda_j [\mathcal{A}_q e_j(x)]^\top [\mathcal{A}_q e_j(x')]. \end{aligned}$$

Therefore,  $u_q(x, x')$  is positive definite because  $\lambda_j > 0$ . In addition,

$$\begin{aligned} \mathbb{S}(p, q) &= \mathbb{E}_{x, x'}[u_q(x, x')] \\ &= \sum_j \lambda_j \mathbb{E}_x[\mathcal{A}_q e_j(x)]^\top \mathbb{E}_{x'}[\mathcal{A}_q e_j(x')] \\ &= \sum_j \lambda_j \|\mathbb{E}_x[\mathcal{A}_q e_j(x)]\|_2^2. \end{aligned}$$

□

*Proof of Theorem 3.8.* We first prove (12) by applying the reproducing property  $k(x, x') = \langle k(x, \cdot), k(x', \cdot) \rangle_{\mathcal{H}}$  on (8):

$$\begin{aligned} \mathbb{S}(p, q) &= \mathbb{E}_{x, x' \sim p}[(\mathbf{s}_q(x) - \mathbf{s}_p(x))^\top k(x, x') (\mathbf{s}_q(x') - \mathbf{s}_p(x'))] \\ &= \mathbb{E}_{x, x' \sim p}[(\mathbf{s}_q(x) - \mathbf{s}_p(x))^\top \langle k(x, \cdot), k(x', \cdot) \rangle_{\mathcal{H}} (\mathbf{s}_q(x') - \mathbf{s}_p(x'))] \\ &= \sum_{\ell=1}^d \langle \mathbb{E}_x[(\mathbf{s}_q^\ell(x) - \mathbf{s}_p^\ell(x))k(x, \cdot)], \mathbb{E}_{x'}[k(x, \cdot)(\mathbf{s}_q^\ell(x') - \mathbf{s}_p^\ell(x'))] \rangle_{\mathcal{H}} \\ &= \sum_{\ell=1}^d \langle \boldsymbol{\beta}_\ell, \boldsymbol{\beta}_\ell \rangle_{\mathcal{H}} \\ &= \|\boldsymbol{\beta}\|_{\mathcal{H}^d}^2 \end{aligned}$$

where we used the fact that  $\boldsymbol{\beta}(x') = \mathbb{E}_{x \sim p}[\mathcal{A}_q k_{x'}(x)] = \mathbb{E}_{x \sim p}[(\mathbf{s}_q(x)k(x, x') + \nabla_x k(x, x'))] = \mathbb{E}_x[(\mathbf{s}_q(x) - \mathbf{s}_p(x))k(x, x')]$ . In addition,

$$\begin{aligned} \langle \mathbf{f}, \boldsymbol{\beta} \rangle_{\mathcal{H}^d} &= \sum_{\ell=1}^d \langle f_\ell, \mathbb{E}_{x \sim p}[(\mathbf{s}_q^\ell(x)k(x, \cdot) + \nabla_{x_\ell} k(x, \cdot))] \rangle_{\mathcal{H}} \\ &= \sum_{\ell=1}^d \mathbb{E}_{x \sim p}[(\mathbf{s}_q^\ell(x) \langle f_\ell, k(x, \cdot) \rangle_{\mathcal{H}} + \langle f_\ell, \nabla_{x_\ell} k(x, \cdot) \rangle_{\mathcal{H}})] \\ &= \sum_{\ell=1}^d \mathbb{E}_{x \sim p}[(\mathbf{s}_q^\ell(x) f_\ell(x) + \nabla_{x_\ell} f_\ell(x))] \\ &= \mathbb{E}_{x \sim p}[\text{trace}(\mathcal{A}_q \mathbf{f}(x))], \end{aligned}$$

where we used the fact that  $\nabla_x f(x) = \langle f(\cdot), \nabla_x k(x, \cdot) \rangle_{\mathcal{H}}$ ; see (Zhou, 2008; Steinwart & Christmann, 2008). The variational form (13) then follows the fact that  $\|\boldsymbol{\beta}\|_{\mathcal{H}^d} = \max_{\mathbf{f} \in \mathcal{H}^d} \{\langle \mathbf{f}, \boldsymbol{\beta} \rangle_{\mathcal{H}^d}, \text{ s.t. } \|\mathbf{f}\|_{\mathcal{H}^d} \leq 1\}$ .

Finally, the  $\boldsymbol{\beta}(\cdot) = \mathbb{E}_{x \sim p}[(\mathbf{s}_q(x)k(x, \cdot) + \nabla_x k(x, \cdot))]$  is in the Stein class of  $p$  because  $k(x, \cdot)$  and  $\nabla_x k(x, \cdot)$  are in the Stein class of  $p$  for any fixed  $x$  (see the proof of Theorem 3.6). □

*Proof Proposition 3.5.* For any  $f \in \mathcal{H}$  with kernel  $k(x, x')$ , we have  $f = \langle f, k(\cdot, x) \rangle_{\mathcal{H}}$  and  $\nabla_x f = \langle f, \nabla_x k(x, \cdot) \rangle_{\mathcal{H}}$ . Therefore,

$$\begin{aligned} \mathbb{E}_{x \sim p}[\mathbf{s}_p(x)f(x) + \nabla_x f(x)] &= \mathbb{E}_{x \sim p}[\mathbf{s}_p(x) \langle f, k(x, \cdot) \rangle_{\mathcal{H}} + \langle f, \nabla_x k(x, \cdot) \rangle_{\mathcal{H}}] \\ &= \langle f, \mathbb{E}_{x \sim p}[\mathbf{s}_p(x)k(x, \cdot) + \nabla_x k(x, \cdot)] \rangle_{\mathcal{H}} \\ &= \langle f, \mathbb{E}_{x \sim p}[\mathcal{A}_p k_x(\cdot)] \rangle_{\mathcal{H}} \\ &= 0, \end{aligned}$$

where the last step used the fact that  $\mathbb{E}_{x \sim p}[\mathcal{A}_p k_x(\cdot)]$  because  $k_x(\cdot) = k(\cdot, x)$  is in the Stein class of  $p$  for any fixed  $x$ . □

*Proof of Theorem 4.1.* Applying the standard asymptotic results of  $U$ -statistics in Serfling (2009, Section 5.5), we just need to check that  $\sigma_u^2 \neq 0$  when  $p \neq q$  and  $\sigma_u^2 = 0$  when  $p = q$ .

We first note that we can show that  $\mathbb{E}_{x' \sim p}[u_q(x, x')] = \text{trace}(\mathcal{A}_q \boldsymbol{\beta})$ , where  $\boldsymbol{\beta}(x) = \mathbb{E}_{x' \sim p}[\mathcal{A}_q k_x(x')]$  and is in the Stein class of  $p$  (see the proof of Theorem 3.6). Therefore, when  $p = q$ , we have  $\boldsymbol{\beta}(x) \equiv 0$  by Stein’s identity, and hence  $\sigma_u^2 = 0$ .

Assume  $\sigma_u^2 = 0$  when  $p \neq q$ , we must have  $\mathbb{E}_{x' \sim p}[u_q(x, x')] = c$ , where  $c$  is a constant. Therefore,

$$c = \mathbb{E}_{x \sim q}(\mathbb{E}_{x' \sim p}[u_q(x, x')]) = \mathbb{E}_{x' \sim p}(\mathbb{E}_{x \sim q}[u_q(x, x')]).$$

Because we can show that  $\mathbb{E}_{x \sim q}[u_q(x, x')] = 0$  following the proof above for  $p = q$ , we must have  $c = 0$ , and hence

$$\mathbb{S}(p, q) = \mathbb{E}_{x \sim p}(\mathbb{E}_{x' \sim p}[u_q(x, x')]) = c = 0,$$

which contradicts with  $p \neq q$ . □

*Proof of Theorem 5.1.* (19) is obtained by applying Cauchy-Schwarz inequality on (8),

$$\begin{aligned} \mathbb{S}(p, q)^2 &= |\mathbb{E}_{x, x'}[(\mathbf{s}_q(x) - \mathbf{s}_p(x))^\top k(x, x')(\mathbf{s}_q(x) - \mathbf{s}_p(x))]|^2 \\ &\leq \mathbb{E}_{x, x'}[k(x, x')^2] \cdot \mathbb{E}_{x, x'}[|(\mathbf{s}_q(x) - \mathbf{s}_p(x))^\top (\mathbf{s}_q(x') - \mathbf{s}_p(x'))|^2] \\ &\leq \mathbb{E}_{x, x'}[k(x, x')^2] \cdot \mathbb{E}_{x, x'}[\|\mathbf{s}_q(x) - \mathbf{s}_p(x)\|_2^2 \cdot \|\mathbf{s}_q(x') - \mathbf{s}_p(x')\|_2^2] \\ &= \mathbb{E}_{x, x'}[k(x, x')^2] \cdot \mathbb{F}(p, q)^2. \end{aligned}$$

To prove (20), we simply note that (13) is equivalent to

$$\sqrt{\mathbb{S}(p, q)} = \max_{\mathbf{f} \in \mathcal{H}^d} \left\{ \mathbb{E}_p[(\mathbf{s}_q(x) - \mathbf{s}_p(x))^\top \mathbf{f}(x)] \quad \text{s.t.} \quad \|\mathbf{f}\|_{\mathcal{H}^d} \leq 1 \right\}.$$

Taking  $\mathbf{f} = (\mathbf{s}_q - \mathbf{s}_p) / \|\mathbf{s}_q(x) - \mathbf{s}_p(x)\|_{\mathcal{H}^d}$  then gives (20). □

**Proposition A.1.** Let  $\mathcal{F}(p) = \mathcal{L}^2(p) \cap \mathcal{S}(p)$ , where  $\mathcal{S}(p)$  represents the Stein class of  $p$ , then we have

$$\sqrt{\mathbb{F}(p, q)} \geq \max_{\mathbf{f} \in \mathcal{F}(p)^d} \left\{ \mathbb{E}_p[\text{trace}(\mathcal{A}_q \mathbf{f}(x))] \quad \text{s.t.} \quad \mathbb{E}_p[\|\mathbf{f}(x)\|_2^2] \leq 1 \right\}.$$

and the equality holds when  $\mathbf{s}_q - \mathbf{s}_p \in \mathcal{F}(p)^d$ .

Note that  $\mathcal{L}^2(p)$  is larger than the Stein class and RKHS, and includes discontinuous, non-smooth functions, and hence we need to ensure  $\mathbf{f}$  is in the Stein class explicitly.

*Proof.* Denote by  $(\mathcal{L}^2(p))^d = \mathcal{L}^2(p) \times \dots \times \mathcal{L}^2(p)$ , note that by the definition of  $\mathbb{F}(p, q)$ , we have

$$\sqrt{\mathbb{F}(p, q)} = \max_{\mathbf{f} \in (\mathcal{L}^2(p))^d} \left\{ \sum_{\ell=1}^d \mathbb{E}_p[f_\ell(x)(s_q^\ell(x) - s_p^\ell(x))] \quad \text{s.t.} \quad \mathbb{E}_p[\|\mathbf{f}(x)\|_2^2] \leq 1 \right\}. \quad (\text{A.1})$$

Restricting the maximizing to  $\mathcal{F}(p)^d$  and applying Lemma 2.3 would give the result. □

## References

- Arcones, M. A. and Gine, E. On the bootstrap of U and V statistics. *The Annals of Statistics*, pp. 655–674, 1992.
- Birge, L. and Massart, P. Estimation of integral functionals of a density. *The Annals of Statistics*, pp. 11–29, 1995.
- Chandrasekaran, V., Srebro, N., and Harsha, P. Complexity of inference in graphical models. In *UAI*. July 2008.
- Chen, M.-H., Shao, Q.-M., and Ibrahim, J. G. *Monte Carlo methods in Bayesian computation*. Springer Science & Business Media, 2012.

- Chwialkowski, K. P., Sejdinovic, D., and Gretton, A. A wild bootstrap for degenerate kernel tests. In *Advances in neural information processing systems*, pp. 3608–3616, 2014.
- Gorham, J. and Mackey, L. Measuring sample quality with stein’s method. In *NIPS*, pp. 226–234, 2015.
- Gretton, A., Fukumizu, K., Harchaoui, Z., and Sriperumbudur, B. K. A fast, consistent kernel two-sample test. In *Advances in neural information processing systems*, pp. 673–681, 2009.
- Gretton, A., Borgwardt, K. M., Rasch, M. J., Schölkopf, B., and Smola, A. A kernel two-sample test. *The Journal of Machine Learning Research*, 13(1):723–773, 2012.
- Hall, P. and Marron, J. S. Estimation of integrated squared density derivatives. *Statistics & Probability Letters*, 6(2): 109–115, 1987.
- Hinton, G. E. and Salakhutdinov, R. R. Reducing the dimensionality of data with neural networks. *Science*, 313(5786): 504–507, 2006.
- Ho, H.-C. and Shieh, G. S. Two-stage U-statistics for hypothesis testing. *Scandinavian journal of statistics*, 33(4):861–873, 2006.
- Hoeffding, W. A class of statistics with asymptotically normal distribution. *The annals of mathematical statistics*, pp. 293–325, 1948.
- Huskova, M. and Janssen, P. Consistency of the generalized bootstrap for degenerate U-statistics. *The Annals of Statistics*, pp. 1811–1823, 1993.
- Hyvärinen, A. Estimation of non-normalized statistical models by score matching. In *Journal of Machine Learning Research*, pp. 695–709, 2005.
- Johnson, O. *Information theory and the central limit theorem*, volume 8. World Scientific, 2004.
- Koller, D. and Friedman, N. *Probabilistic graphical models: principles and techniques*. MIT press, 2009.
- Krishnamurthy, A., Kandasamy, K., Poczos, B., and Wasserman, L. Nonparametric estimation of Renyi divergence and friends. In *ICML*, 2014.
- Lehmann, E. L. and Romano, J. P. *Testing statistical hypotheses*. Springer Science & Business Media, 2006.
- Ley, C. and Swan, Y. Stein’s density approach and information inequalities. *Electron. Comm. Probab*, 18(7):1–14, 2013.
- Lyu, S. Interpretation and generalization of score matching. In *UAI*, pp. 359–366, 2009.
- Marsden, J. E. and Tromba, A. *Vector calculus*. Macmillan, 2003.
- Neal, R. M. Annealed importance sampling. *Statistics and Computing*, 11(2):125–139, 2001.
- Salakhutdinov, R. Learning deep generative models. *Annual Review of Statistics and Its Application*, 2(1):361–385, 2015.
- Salakhutdinov, R. and Murray, I. On the quantitative analysis of deep belief networks. In *ICML*, pp. 872–879, 2008.
- Serfling, R. J. *Approximation theorems of mathematical statistics*, volume 162. John Wiley & Sons, 2009.
- Sriperumbudur, B., Fukumizu, K., Kumar, R., Gretton, A., and Hyvärinen, A. Density estimation in infinite dimensional exponential families. *arXiv preprint arXiv:1312.3516*, 2013.
- Stein, C. A bound for the error in the normal approximation to the distribution of a sum of dependent random variables. In *Proceedings of the Sixth Berkeley Symposium on Mathematical Statistics and Probability, Volume 2: Probability Theory*, pp. 583–602, 1972.
- Stein, C., Diaconis, P., Holmes, S., Reinert, G., et al. Use of exchangeable pairs in the analysis of simulations. In *Stein’s Method*, pp. 1–25. Institute of Mathematical Statistics, 2004.
- Steinwart, I. and Christmann, A. *Support vector machines*. Springer Science & Business Media, 2008.

## Appendix for “A Kernelized Stein Discrepancy for Goodness-of-fit Tests”

---

- Welling, M., Rosen-Zvi, M., and Hinton, G. E. Exponential family harmoniums with an application to information retrieval. In *Advances in neural information processing systems*, pp. 1481–1488, 2004.
- Zaremba, W., Gretton, A., and Blaschko, M. B. B-tests: Low variance kernel two-sample tests. In *NIPS*, pp. 755–763, 2013.
- Zhou, D.-X. Derivative reproducing properties for kernel methods in learning theory. *Journal of computational and Applied Mathematics*, 220(1):456–463, 2008.
